# Supplementary material for: Amivantamab plus lazertinib in osimertinib-relapsed EGFR-mutant advanced non-small cell lung cancer: a phase 1 trial
Source: PubMed Central journal article supplement (PMC10579096; doi:10.1038/s41591-023-02554-7), 2023-09-14

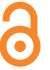

---

# Amivantamab plus lazertinib in osimertinib-relapsed *EGFR*-mutant advanced non-small cell lung cancer: a phase 1 trial

---

In the format provided by the authors and unedited

## SUPPLEMENT

**Table S1. Demographic and Baseline Disease Characteristics**

|                                                                    | <b>Combination Cohort<br/>(n=26)</b> |
|--------------------------------------------------------------------|--------------------------------------|
| Median age, yr (min–max)                                           | 60 (36 – 78)                         |
| Sex                                                                |                                      |
| Female                                                             | 16 (62)                              |
| Male                                                               | 10 (38)                              |
| Race                                                               |                                      |
| Asian                                                              | 26 (100)                             |
| White                                                              | 0                                    |
| Black                                                              | 0                                    |
| Multiple / not reported                                            | 0                                    |
| ECOG PS                                                            |                                      |
| 0                                                                  | 10 (38)                              |
| 1                                                                  | 16 (62)                              |
| History of smoking                                                 |                                      |
| Yes                                                                | 12 (46)                              |
| No                                                                 | 14 (54)                              |
| Median time from initial diagnosis to first dose, months (min–max) | 31 (1 – 75)                          |
| Location of metastases <sup>a</sup>                                |                                      |
| Lymph node                                                         | 9 (35)                               |
| Bone                                                               | 3 (12)                               |
| Brain                                                              | 9 (35)                               |
| Liver                                                              | 1 (4)                                |
| Adrenal gland                                                      | 0                                    |
| Other / not reported                                               | 17 (65)                              |
| Median prior lines of therapy (min–max)                            | 2 (0 – 9)                            |

|                                                |         |
|------------------------------------------------|---------|
| Prior systemic therapy                         |         |
| Platinum-based chemotherapy <sup>b</sup>       | 11 (42) |
| EGFR TKI <sup>a</sup>                          |         |
| 1 <sup>st</sup> or 2 <sup>nd</sup> -generation | 21 (81) |
| 3 <sup>rd</sup> -generation                    | 8 (31)  |
| No prior therapy                               | 3 (12)  |

Data are number of patients (%) unless otherwise noted.

<sup>a</sup>Patients could be counted in more than one category.

<sup>b</sup>For the dose escalation cohort (n=26), there were no restrictions on prior therapies; the additional 7 patients in the all-treated population had less than 2 cycles of platinum-based chemotherapy (duration 22-65 days).

ECOG PS, Eastern Cooperative Oncology Group performance status; EGFR, epidermal growth factor receptor; NSCLC, non-small cell lung cancer; TKI, tyrosine kinase inhibitor.

**Table S2. Adverse Events**

| Adverse events (≥10%), n (%)                         | Dose Escalation Cohort (n=26) |          |
|------------------------------------------------------|-------------------------------|----------|
|                                                      | All-grade                     | Grade ≥3 |
| Skin and subcutaneous tissue disorders               |                               |          |
| Rash <sup>a</sup>                                    | 25 (96)                       | 2 (8)    |
| Pruritus                                             | 11 (42)                       | 0        |
| Dry skin                                             | 3 (12)                        | 0        |
| General disorders and administration site conditions |                               |          |
| Infusion-related reaction                            | 16 (62)                       | 1 (4)    |
| Edema <sup>b</sup>                                   | 7 (27)                        | 0        |
| Fatigue <sup>c</sup>                                 | 6 (23)                        | 0        |
| Pyrexia                                              | 5 (19)                        | 0        |
| Infections and infestations                          |                               |          |
| Paronychia                                           | 19 (73)                       | 2 (8)    |
| Conjunctivitis                                       | 2 (8)                         | 0        |
| Metabolism and nutrition disorders                   |                               |          |
| Hypoalbuminemia                                      | 14 (54)                       | 1 (4)    |
| Decreased appetite                                   | 9 (35)                        | 0        |
| Hypocalcemia                                         | 4 (15)                        | 1 (4)    |
| Hypomagnesemia                                       | 3 (12)                        | 0        |
| Hyponatremia                                         | 3 (12)                        | 3 (12)   |
| Musculoskeletal and connective tissue disorders      |                               |          |
| Musculoskeletal pain <sup>d</sup>                    | 10 (38)                       | 0        |
| Gastrointestinal disorders                           |                               |          |
| Stomatitis <sup>e</sup>                              | 11 (42)                       | 0        |
| Nausea                                               | 6 (23)                        | 1 (4)    |
| Constipation                                         | 7 (27)                        | 0        |
| Diarrhea                                             | 6 (23)                        | 1 (4)    |
| Dyspepsia                                            | 6 (23)                        | 0        |
| Abdominal pain                                       | 4 (15)                        | 0        |

|                                                  |         |       |
|--------------------------------------------------|---------|-------|
| Anal inflammation                                | 1 (4)   | 0     |
| Hemorrhoids                                      | 0       | 0     |
| Investigations                                   |         |       |
| Increased ALT                                    | 8 (31)  | 2 (8) |
| Increased AST                                    | 8 (31)  | 1 (4) |
| Increased GGT                                    | 2 (8)   | 1 (4) |
| Increased CPK                                    | 1 (4)   | 0     |
| Nervous system disorders                         |         |       |
| Paresthesia                                      | 12 (46) | 0     |
| Dizziness                                        | 7 (27)  | 0     |
| Respiratory, thoracic, and mediastinal disorders |         |       |
| Dyspnea <sup>f</sup>                             | 1 (4)   | 1 (4) |
| Pleural effusion                                 | 4 (15)  | 1 (4) |
| Pulmonary embolism                               | 3 (12)  | 0     |
| Cough <sup>g</sup>                               | 2 (8)   | 0     |
| Vascular disorders                               |         |       |
| Hemorrhage <sup>h</sup>                          | 2 (8)   | 0     |
| Blood and lymphatic system disorders             |         |       |
| Anemia                                           | 3 (12)  | 2 (8) |
| Renal and urinary disorders                      |         |       |
| Acute kidney injury                              | 0       | 0     |
| Hepatobiliary disorders                          |         |       |
| Cholecystitis                                    | 0       | 0     |

<sup>a</sup>Rash includes acne, dermatitis, dermatitis acneiform, eczema, eczema asteatotic, palmar-plantar erythrodysesthesia syndrome, perineal rash, rash, rash erythematous, rash maculo-papular, rash papular, rash vesicular, skin exfoliation, and toxic epidermal necrolysis

<sup>b</sup>Edema includes eyelid edema, face edema, generalized edema, lip edema, edema, edema peripheral, periorbital edema, peripheral swelling, oedema, oedema peripheral

<sup>c</sup>Fatigue includes asthenia and fatigue

<sup>d</sup>Musculoskeletal pain includes arthralgia, arthritis, back pain, bone pain, musculoskeletal chest pain, musculoskeletal discomfort, musculoskeletal pain, myalgia, neck pain, non-cardiac chest pain, pain in extremity, spinal pain

<sup>e</sup>Stomatitis includes aphthous ulcer, cheilitis, glossitis, mouth ulceration, mucosal inflammation, pharyngeal inflammation, stomatitis

<sup>f</sup>Dyspnea includes dyspnea and dyspnea exertional

<sup>g</sup>Cough includes cough, productive cough, and upper airway cough syndrome

<sup>h</sup>Hemorrhage includes epistaxis, gingival bleeding, hematuria, hemoptysis, hemorrhage, mouth hemorrhage, mucosal hemorrhage

ALT, alanine aminotransferase; AST, aspartate aminotransferase; CPK, creatine phosphokinase; GGT, gamma-glutamyltransferase

**Table S3. Identified Alterations Among Patients with EGFR and/or MET-based Osimertinib Resistance**

| <b>Resistance<sup>a</sup></b> | <b>Alterations<sup>b</sup></b>                                                                                                                                                        |
|-------------------------------|---------------------------------------------------------------------------------------------------------------------------------------------------------------------------------------|
| EGFR-based                    | C797S (n=7)<br>Amp (n=3)<br>L718X (n=3)<br>G724S (n=2)<br>L792H (n=1)<br>G796S (n=1)<br>E709K (n=1)                                                                                   |
| MET-based                     | Amp (n=5)<br>METex14 (n=1)                                                                                                                                                            |
| Additional                    | PIK3CA E542X (n=2)<br>CCNE1 Amp (n=1)<br>PIK3CA Amp (n=1)<br>CCND1 Amp (n=1)<br>CDK4 Amp (n=1)<br>KRAS Amp (n=1)<br>FGFR3-TACC3 fusion (n=1)<br>KRAS G12D (n=1)<br>CDKN2A G101W (n=1) |

<sup>a</sup>EGFR amp (CNV  $\geq 7$ ) and MET amp (CNV  $\geq 3$ ) were based on tumor NGS; other amps were based on tumor NGS (CNV  $\geq 7$ ) or ctDNA NGS (CNV  $\geq 3$ ). Single nucleotide variants, insertion/deletions, and insertion call threshold was  $\geq 1\%$  allele frequency with  $>250$  reads.

<sup>b</sup>Patients could be counted in more than one category; 8 patients had  $\geq 1$  alteration.

Amp, amplification; CCND1, cyclin D1; CCNE1, cyclin E1; CDK4, cyclin dependent kinase 4; CDKN2A, cyclin dependent kinase inhibitor 2A; EGFR, epidermal growth factor receptor; FGFR3-TACC3, fibroblast growth factor receptor 3–transforming acidic coiled coil-containing protein 3; KRAS, Kirsten rat sarcoma virus; PIK3CA, phosphatidylinositol-4,5-bisphosphate 3-kinase catalytic subunit alpha

**Table S4 Best Response and Associated Biomarker Data of the Osimertinib-relapsed Cohort**

| Patient | Best Response <sup>a</sup> | EGFR/MET-based Resistance |                   | EGFR/MET-independent Resistance |           | EGFR and MET IHC staining |              |             |
|---------|----------------------------|---------------------------|-------------------|---------------------------------|-----------|---------------------------|--------------|-------------|
|         |                            | Plasma                    | Tumor             | Plasma                          | Tumor     | IHC evaluable?            | EGFR H score | MET H score |
| 1       | PD                         | -                         | n.d.              | PIK3CA E545K                    | n.d.      | n                         | -            | -           |
| 2       | NE/UNK                     | -                         | -                 | -                               | -         | y                         | 2            | 0           |
| 3       | NE/UNK                     | -                         | -                 | -                               | -         | y                         | 70           | 110         |
| 4       | NE/UNK                     | -                         | n.d.              | -                               | n.d.      | n                         | -            | -           |
| 5       | PD                         | -                         | EGFR Amp (CNV=14) | CCNE1 amp;<br>PIK3CA amp        | -         | y                         | 36           | 3           |
| 6       | PD                         | -                         | -                 | PTEN N48K; Alk-SQSTM1 fusion    | -         | n                         | -            | -           |
| 7       | PD                         | -                         | n.d.              | KRAS A18V                       | n.d.      | n                         | -            | -           |
| 8       | PD                         | -                         | n.d.              | -                               | n.d.      | n                         | -            | -           |
| 9       | SD                         | -                         | n.d.              | CCND2 amp                       | n.d.      | n                         | -            | -           |
| 10      | SD                         | -                         | -                 | -                               | CCND1 amp | y                         | 210          | 0           |
| 11      | SD                         | -                         | n.d.              | -                               | n.d.      | n                         | -            | -           |
| 12      | PD                         | EGFR C797S                | EGFR C797S        | -                               | -         | n                         | -            | -           |
| 13      | PD                         | -                         | n.d.              | PIK3CA E545K;<br>KRAS G12C      | n.d.      | n                         | -            | -           |
| 14      | SD                         | -                         | n.d.              | -                               | n.d.      | n                         | -            | -           |
| 15      | NE/UNK                     | -                         | n.d.              | PIK3CA H1047R                   | n.d.      | n                         | -            | -           |
| 16      | PD                         | -                         | -                 | -                               | -         | y                         | 250          | 101         |
| 17      | PD                         | -                         | -                 | PTEN I33del                     | -         | n                         | -            | -           |
| 18      | PD                         | -                         | -                 | -                               | CCND1 amp | n                         | -            | -           |
| 19      | SD                         | EGFR C797S                | n.d.              | -                               | n.d.      | n                         | -            | -           |



|    |    |                           |                                  |                                 |                                         |   |     |     |
|----|----|---------------------------|----------------------------------|---------------------------------|-----------------------------------------|---|-----|-----|
| 20 | SD | EGFR C797S                | -                                | FGFR3-TACC3 fusion              | -                                       | n | -   | -   |
| 21 | SD | -                         | -                                | -                               | -                                       | n | -   | -   |
| 22 | SD | -                         | n.d.                             | PIK3CA E545K                    | n.d.                                    | n | -   | -   |
| 23 | SD | EGFR C797S                | MET amp (CNV=4)                  | -                               | -                                       | y | 75  | 300 |
| 24 | SD | EGFR C797S                | -                                | KRAS G12D                       | -                                       | y | 60  | 5   |
| 25 | SD | -                         | n.d.                             | -                               | n.d.                                    | n | -   | -   |
| 26 | PD | MET Exon 14 skip          | -                                | -                               | -                                       | y | 10  | 70  |
| 27 | SD | EGFR C797S;<br>EGFR L718Q | MET amp (CNV=7)                  | PIK3CA H1047L;<br>PIK3CA H1047R | KRAS amp                                | n | -   | -   |
| 28 | SD | EGFR G724S                | EGFR G724S                       | -                               | -                                       | y | 180 | 292 |
| 29 | SD | -                         | -                                | -                               | -                                       | y | 102 | 19  |
| 30 | PR | -                         | -                                | -                               | -                                       | y | 290 | 300 |
| 31 | PR | EGFR C797S                | EGFR C797S                       | -                               | -                                       | n | -   | -   |
| 32 | PR | EGFR L718V;<br>EGFR L718Q | EGFR L718Q                       | PIK3CA E542V                    | PIK3CA E542V                            | y | 175 | 295 |
| 33 | PR | n.d.                      | n.d.                             | n.d.                            | n.d.                                    | n | -   | -   |
| 34 | PR | -                         | MET amp (CNV=31)                 | -                               | -                                       | y | 280 | 300 |
| 35 | PR | -                         | n.d.                             | -                               | n.d.                                    | n | -   | -   |
| 36 | PR | EGFR G796S                | EGFR E709K;<br>EGFR amp (CNV=37) | -                               | PIK3CA E542K;<br>CCND1 amp;<br>CDK4 amp | y | 300 | 150 |
| 37 | PR | -                         | -                                | -                               | -                                       | y | 250 | 185 |
| 38 | PR | -                         | -                                | -                               | -                                       | y | 299 | 220 |
| 39 | PR | -                         | -                                | -                               | -                                       | y | 270 | 300 |
| 40 | PR | EGFR L792H                | n.d.                             | -                               | n.d.                                    | n | -   | -   |
| 41 | PR | -                         | n.d.                             | -                               | n.d.                                    | n | -   | -   |

|    |    |            |                                 |              |   |   |     |     |
|----|----|------------|---------------------------------|--------------|---|---|-----|-----|
| 42 | PR | EGFR G724S | EGFR G724S;<br>EGFR amp (CNV=8) | CDKN2A G101W | - | n | -   | -   |
| 43 | PR | -          | -                               | -            | - | y | 150 | 295 |
| 44 | PR | -          | MET amp (CNV=3)                 | -            | - | y | 1   | 175 |
| 45 | CR | -          | MET amp (CNV=3)                 | -            | - | y | 159 | 300 |

<sup>a</sup>All PR and CR were confirmed.

Amp, amplification; CCND1, cyclin D1; CCNE1, cyclin E1; CDK4, cyclin dependent kinase 4; CDKN2A, cyclin dependent kinase inhibitor 2A; EGFR, epidermal growth factor receptor; FGFR3-TACC3, fibroblast growth factor receptor 3–transforming acidic coiled coil-containing protein 3; KRAS, Kirsten rat sarcoma virus; n.d, not done; PIK3CA, phosphatidylinositol-4,5-bisphosphate 3-kinase catalytic subunit alpha

**Table S5. Investigator-assessed Response by Biomarker Analysis in the Osimertinib-relapsed Cohort**

|                           | NGS-based Testing (n=45)         |                                                 | IHC-based Testing (n=20) |                     |
|---------------------------|----------------------------------|-------------------------------------------------|--------------------------|---------------------|
|                           | EGFR/MET-based Resistance (n=17) | Non-EGFR/MET-based or Unknown Resistance (n=28) | IHC-positive (n=10)      | IHC-negative (n=10) |
| ORR <sup>a</sup> (95% CI) | 47% (23 – 72)                    | 29% (13 – 49)                                   | 90% (56 – 100)           | 10% (0.3 – 45)      |
| CBR <sup>b</sup> (95% CI) | 82% (57 – 96)                    | 54% (34 – 73)                                   | 100% (69 – 100)          | 50% (19 – 81)       |
| mDOR, months (95% CI)     | 10.4 (2.7 – NC)                  | 8.3 (2.6 – NC)                                  | 9.7 (2.6 – NC)           | 2.7 (NC – NC)       |
| mPFS, months (95% CI)     | 6.7 (3.4 – 12.5)                 | 4.1 (1.4 – 9.5)                                 | 12.5 (4.0 – NC)          | 4.0 (1.4 – 4.4)     |

<sup>a</sup>Proportion of patients who had partial and complete responses.

<sup>b</sup>Proportion of patients who had partial and complete responses or stable disease for at least 11 weeks (corresponding to two disease assessments).

CBR, clinical benefit rate; CI, confidence interval; mDOR, median duration of response; mOS, median overall survival; mPFS, median progression-free survival; NC, not calculable; ORR, overall response rate; RECIST, Response Evaluation Criteria in Solid Tumors

**Table S6. Best Response in Patients with Identified EGFR and/or MET-based Osimertinib Resistance Mechanisms**

| Patient | EGFR and/or MET-based Osimertinib Resistance Mechanism <sup>a</sup>              | Additional Alterations <sup>a</sup> | EGFR H Score  | MET H Score   | Best Response |
|---------|----------------------------------------------------------------------------------|-------------------------------------|---------------|---------------|---------------|
| 1       | MET Amp (CNV=4)                                                                  |                                     | 159           | 300           | CR            |
| 2       | MET Amp (CNV=3)                                                                  |                                     | 1             | 175           | PR            |
| 3       | EGFR G724S, EGFR Amp (CNV=8)                                                     | CDKN2A G101W                        | Not performed | Not performed | PR            |
| 4       | EGFR G796S, EGFR E709K, EGFR Amp (CNV=37)                                        | CCND1 Amp, CDK4 Amp, PIK3CA E542K   | 300           | 150           | PR            |
| 5       | EGFR L792H                                                                       |                                     | Not performed | Not performed | PR            |
| 6       | MET Amp (CNV=31)                                                                 |                                     | 280           | 300           | PR            |
| 7       | EGFR L718Q, EGFR L718V                                                           | PIK3CA E542V                        | 175           | 295           | PR            |
| 8       | EGFR C797S <sup>b</sup> (plasma + tissue)                                        |                                     | Not performed | Not performed | PR            |
| 9       | EGFR G724S                                                                       |                                     | 180           | 292           | SD            |
| 10      | EGFR C797S <sup>b</sup> (plasma only), EGFR L718Q (plasma only), MET Amp (CNV=7) | KRAS Amp                            | Not performed | Not performed | SD            |
| 11      | EGFR C797S <sup>b</sup> (plasma only)                                            | KRAS G12D                           | 60            | 5             | SD            |
| 12      | EGFR C797S <sup>b</sup> (plasma only), MET Amp (CNV=4)                           |                                     | 75            | 300           | SD            |
| 13      | EGFR C797S <sup>b</sup> (plasma only)                                            | FGFR3-TACC3 Fusion                  | Not performed | Not performed | SD            |
| 14      | EGFR C797S <sup>b</sup> (plasma only; tumor not tested)                          |                                     | Not performed | Not performed | SD            |
| 15      | MET Exon 14                                                                      |                                     | 10            | 70            | PD            |
| 16      | EGFR C797S <sup>b</sup> (plasma + tumor)                                         |                                     | Not performed | Not performed | PD            |
| 17      | EGFR Amp (CNV=14)                                                                | CCNE1 Amp, PIK3CA Amp               | 36            | 3             | PD            |

<sup>a</sup>EGFR amp (CNV ≥7) and MET amp (CNV ≥3) were based on tumor NGS; other amps were based on tumor NGS (CNV ≥7) or ctDNA NGS (CNV ≥3). Single nucleotide variants, insertion/deletions, and insertion call threshold was ≥1% allele frequency with >250 reads.

<sup>b</sup>All C797S mutations were of the cis configuration.

Amp, amplification; CCND1, cyclin D1; CCNE1, cyclin E1; CDK4, cyclin dependent kinase 4; CDKN2A, cyclin dependent kinase inhibitor 2A; EGFR, epidermal growth factor receptor; FGFR3-TACC3, fibroblast growth factor receptor 3–transforming acidic coiled coil-containing protein 3; KRAS, Kirsten rat sarcoma virus; PIK3CA, phosphatidylinositol-4,5-bisphosphate 3-kinase catalytic subunit alpha

**Table S7. Identified Alterations Among Patients without EGFR and/or MET-based Osimertinib Resistance**

| <b>Resistance</b>           | <b>Alterations<sup>a</sup></b>                                                                                                                                                           |
|-----------------------------|------------------------------------------------------------------------------------------------------------------------------------------------------------------------------------------|
| EGFR/MET-independent (n=10) | PIK3CA E545K (n=3)<br>CCND1 Amp (n=2)<br>CCND2 Amp (n=1)<br>KRAS A18V (n=1)<br>KRAS G12C (n=1)<br>PIK3CA H1047R (n=1)<br>PTEN I33del (n=1)<br>PTEN N48K (n=1)<br>SQSTM1-ALK fusion (n=1) |
| Not identified (n=18)       |                                                                                                                                                                                          |

<sup>a</sup>Patients could be counted in more than one category; 2 patients had ≥1 alteration

Amp, amplification; CCND1, cyclin D1; CCND2, cyclin D2; KRAS, Kirsten rat sarcoma virus; PIK3CA, phosphatidylinositol-4,5-bisphosphate 3-kinase catalytic subunit alpha; PTEN, phosphatase and tensin homolog deleted on chromosome 10; SQSTM1-ALK, sequestosome 1- anaplastic lymphoma kinase

**Table S8. Participating Study Sites and Associated Institutional Review Boards**

| <b>Participating Study Site</b>                     | <b>City</b>                    | <b>Institutional Review Board</b>                                                                                       |
|-----------------------------------------------------|--------------------------------|-------------------------------------------------------------------------------------------------------------------------|
| Austin Hospital                                     | Heidelberg, Australia          | Austin Health Human Research Ethics Committee<br>-----<br>Austin Health Office for Research                             |
| University Health Network                           | Toronto, Canada                | UHN Research Ethics Board                                                                                               |
| Hosp. Univ. Quiron Dexeus                           | Barcelona, Spain               | Comité Regional de la Comunidad de Madrid                                                                               |
| Hosp. Gral. Univ. Gregorio Maranon                  | Madrid, Spain                  | Comité Regional de la Comunidad de Madrid                                                                               |
| Royal Marsden Hospital                              | Sutton, UK                     | Bristol HRA Centre<br>-----<br>North West - Haydock Research Ethics Committee<br>-----<br>R&D Office, The Royal Marsden |
| Samsung Medical Center                              | Seoul, Republic of Korea       | Samsung Medical Center Institutional Review Board                                                                       |
| Seoul National University Hospital                  | Seoul, Republic of Korea       | Seoul National University Hospital Institutional Review Board                                                           |
| Severance Hospital, Yonsei University Health System | Seoul, Republic of Korea       | Severance Hospital Institutional Review Board                                                                           |
| Gachon University Gil Medical Center                | Incheon, Republic of Korea     | Gachon University Gil Medical Center Institutional Review Board                                                         |
| Chungbuk National University Hospital               | Cheongju-si, Republic of Korea | Chungbuk National University Hospital Institutional Review Board                                                        |
| Asan Medical Center                                 | Seoul, Republic of Korea       | Asan Medical Center                                                                                                     |
| H. Lee Moffitt Cancer & Research Institute          | Tampa, FL, USA                 | Chesapeake Institutional Review Board<br>-----<br>Advarra                                                               |
| City of Hope                                        | Duarte, CA, USA                | Western Institutional Review Board                                                                                      |

|                                                                                                  |                         |                                                                                      |
|--------------------------------------------------------------------------------------------------|-------------------------|--------------------------------------------------------------------------------------|
| University of Pennsylvania Division of Hematology Oncology Perelman Center for Advanced Medicine | Philadelphia, PA, USA   | University of Pennsylvania Office of Regulatory Affairs Institutional Review Board   |
| Dana Farber Cancer Institute                                                                     | Boston, MA, USA         | Dana-Farber Cancer Institute Institutional Review Board                              |
| Samuel Oschin Comprehensive Cancer Center Cedars-Sinai Medical Center                            | West Hollywood, CA, USA | Cedars Sinai Office of Research Compliance and Quality Improvement                   |
| Langone Health at NYC University, NYU School of Medicine                                         | New York, NY, USA       | NYU School of Medicine Institutional Review Board                                    |
| Providence Portland Medical Center                                                               | Portland, OR, USA       | Providence St. Joseph Health Institutional Review Board                              |
| Virginia Cancer Specialists                                                                      | Fairfax, VA, USA        | Advarra                                                                              |
| Icahn School of Medicine at Mt. Sinai                                                            | New York, NY, USA       | Icahn School of Medicine at Mount Sinai-Program for the Protection of Human Subjects |
| UCLA                                                                                             | Santa Monica, CA. USA   | UCLA Office of Human Research Protection Program                                     |
| Barbara Ann Karmanos Cancer Institute                                                            | Detroit, MI, USA        | Western Institutional Review Board                                                   |
| University of Chicago                                                                            | Chicago, IL, USA        | University of Chicago Institutional Review Board                                     |
| Chao Family Comprehensive Cancer Center                                                          | Orange, CA, USA         | UC Irvine Institutional Review Board                                                 |
| Oncology Consultants - Texas                                                                     | Houston, TX, USA        | Advarra                                                                              |



## Representative Images of IHC Staining

### A. IHC Positive

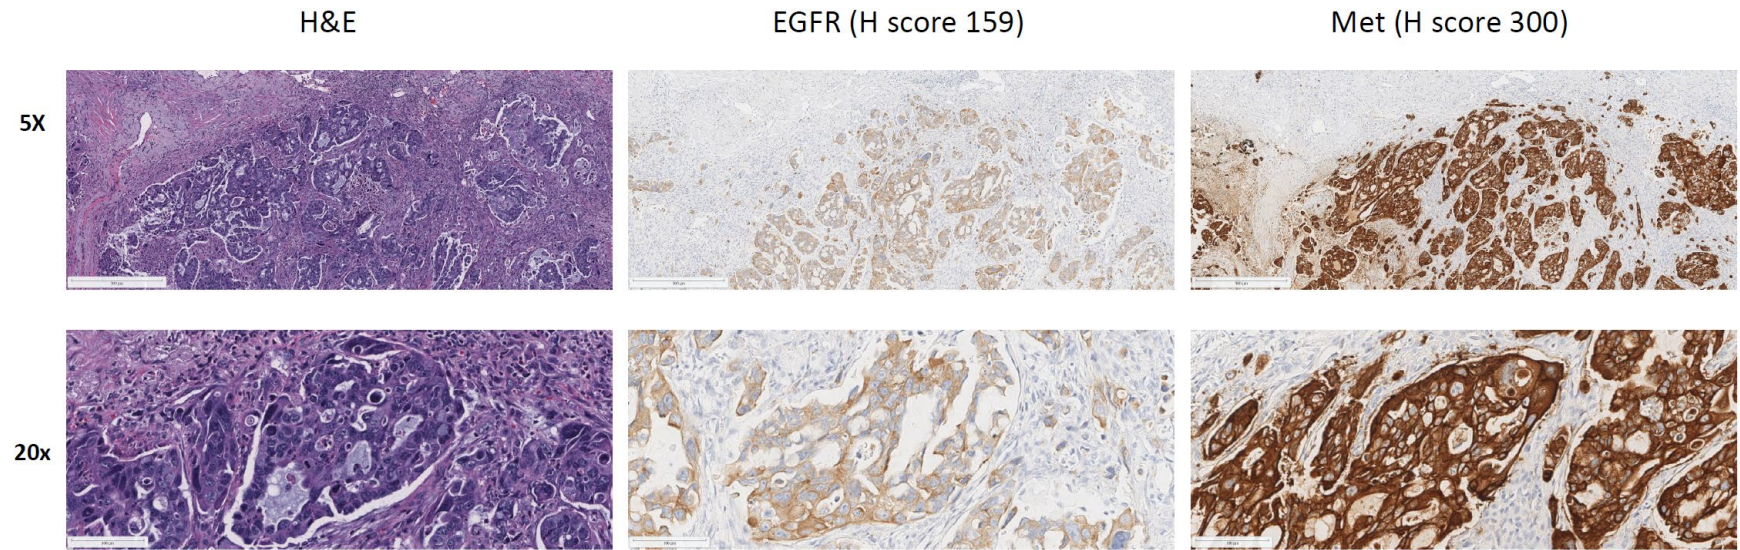

H&E

EGFR (H score 300)

Met (H score 150)

5X

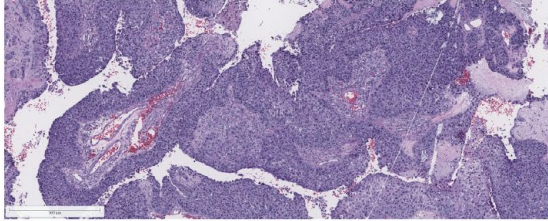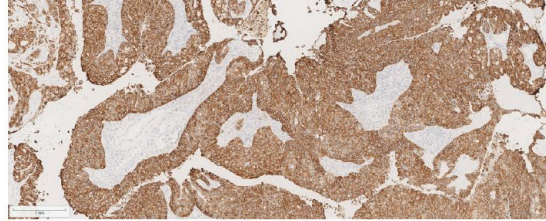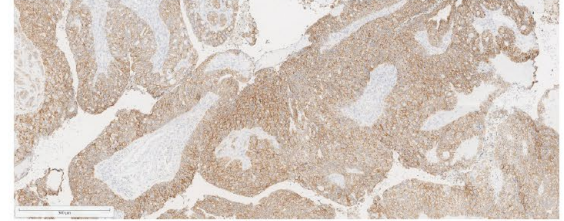

20x

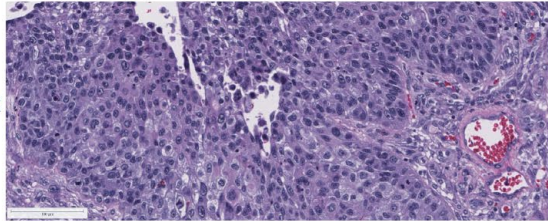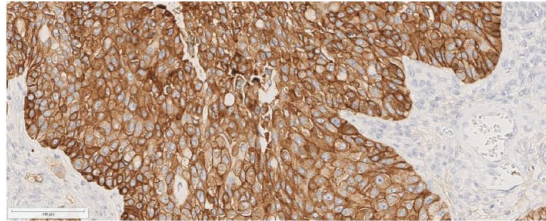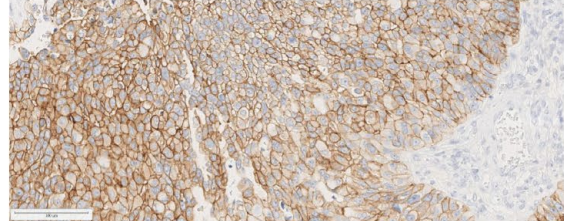

H&E

EGFR (H score 280)

Met (H score 300)

5X

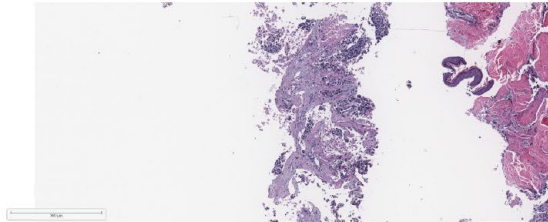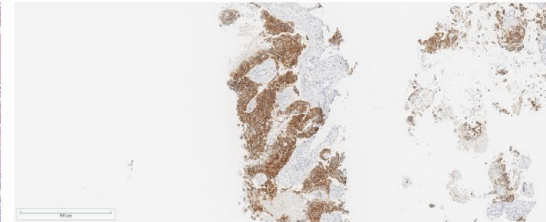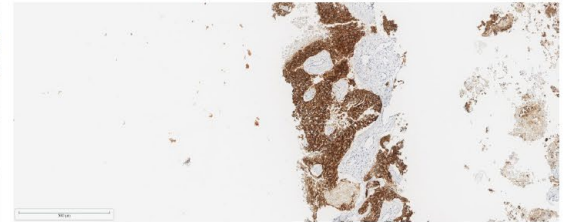

20x

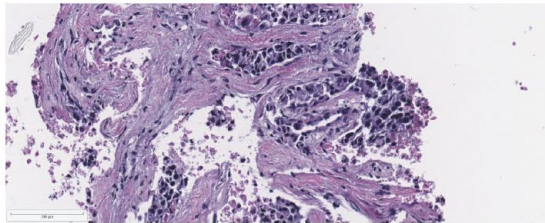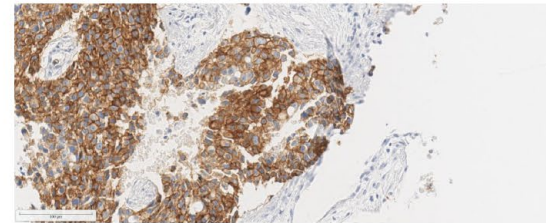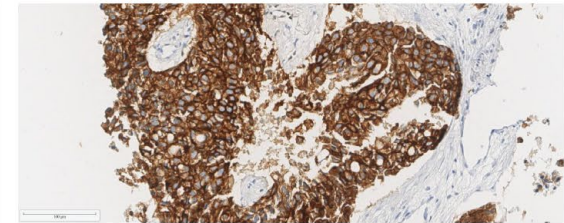

**B. IHC Negative**

H&E

EGFR (H score 10)

Met (H score 70)

5X

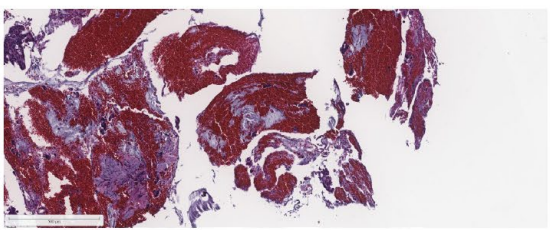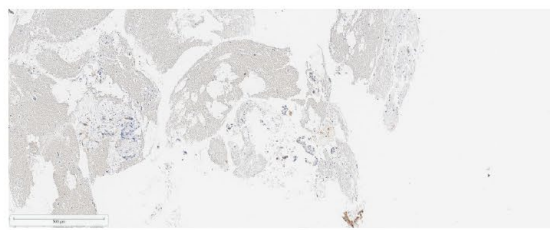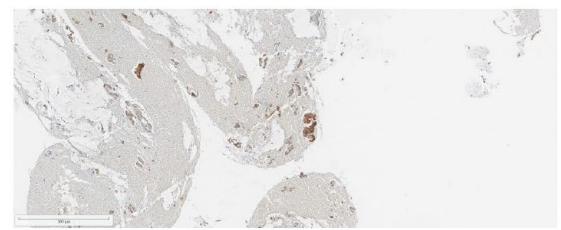

20x

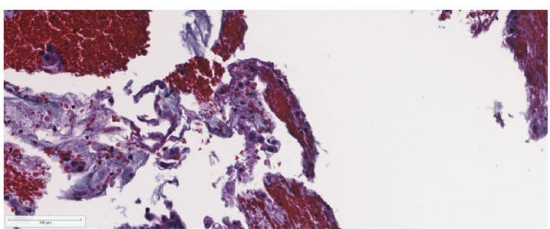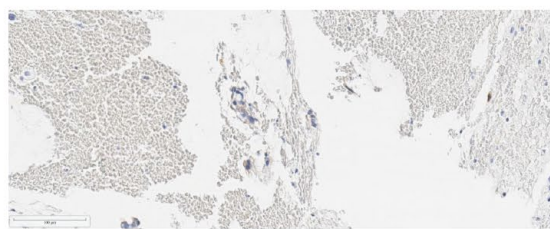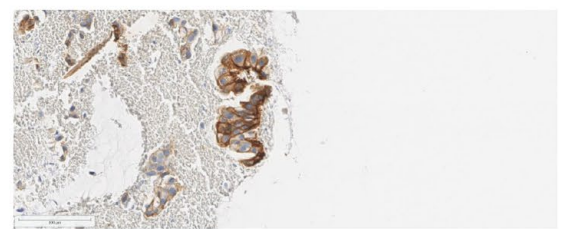

H&E

EGFR (H score 36)

Met (H score 3)

5X

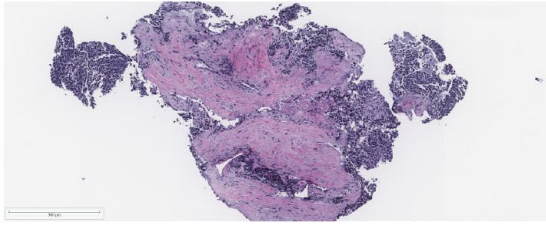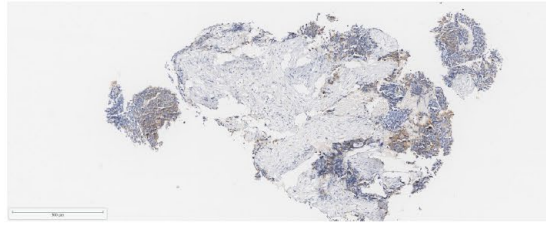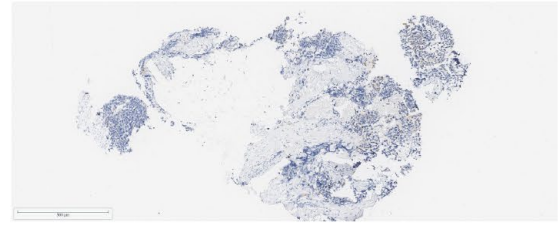

20x

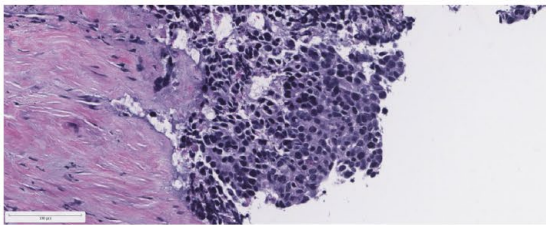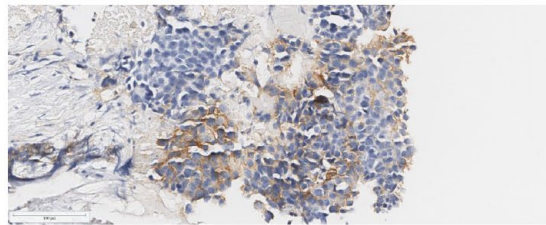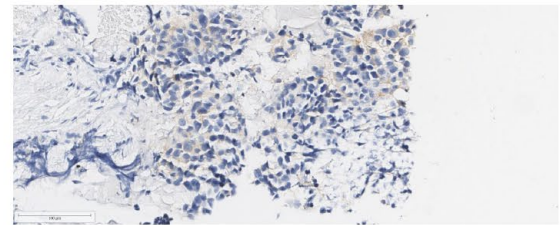

H&E

EGFR (H score 2)

Met (H score 0)

5X

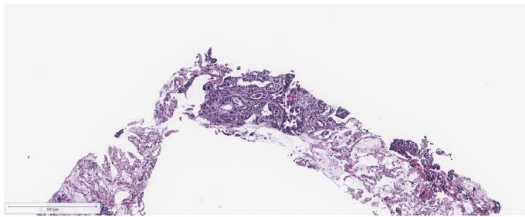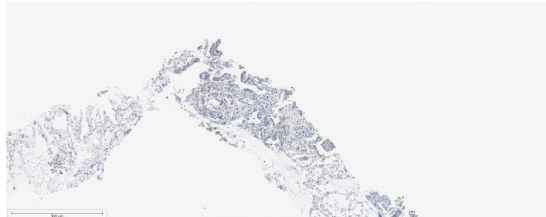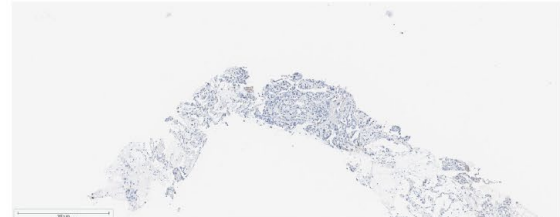

20x

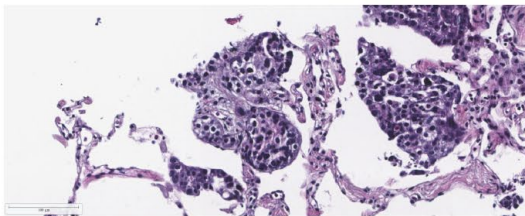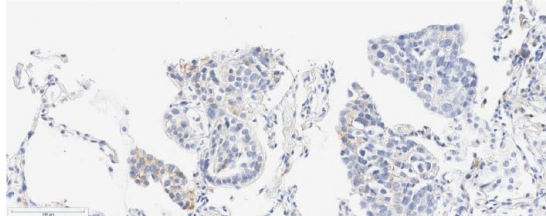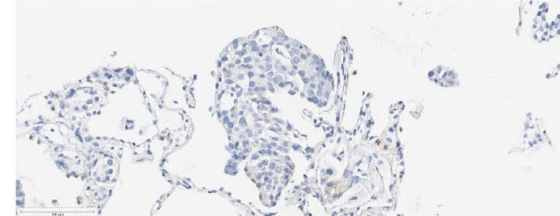

Supplement: 41591_2023_2554_MOESM1_ESM.pdf [file 41591_2023_2554_MOESM1_ESM.pdf]
